# Supplementary material for: Highly emissive and color-tunable copper-based halide composites for bright white light-emitting diodes
Source: Royal Society of Chemistry journal article supplement (doi:10.1039/d2qm00172a), 2022-01-01
Supplement: d2qm00172a1.pdf [file d2qm00172a1.pdf]

## Supporting Information

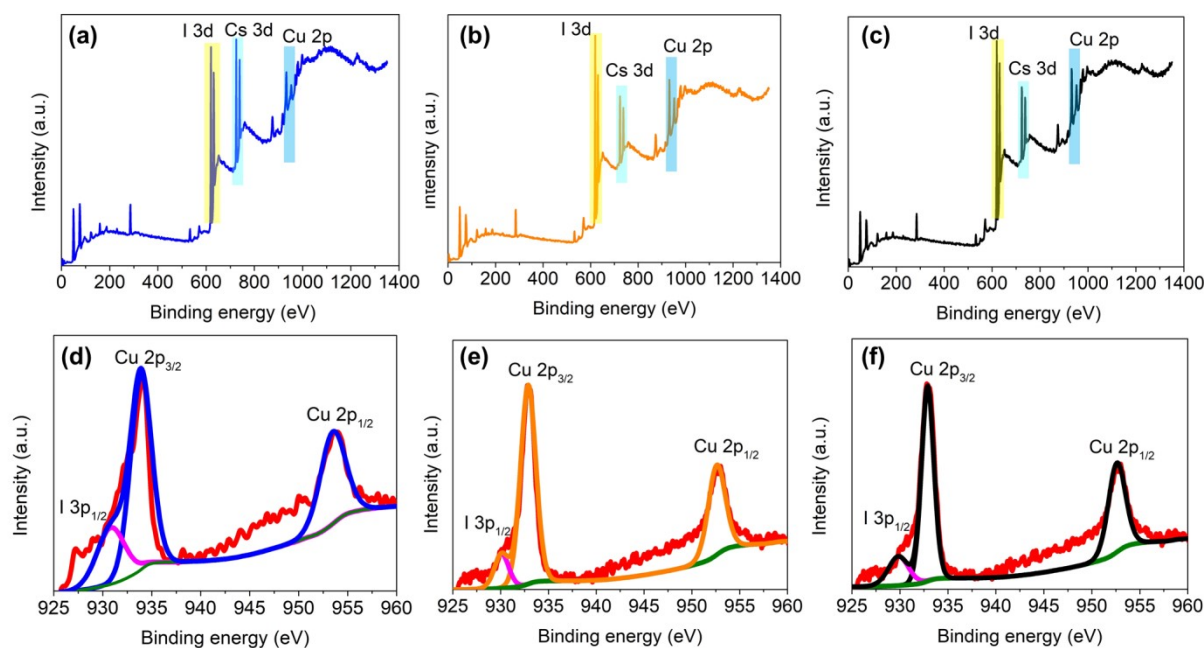

**Figure S1.** XPS survey spectra of (a)  $\text{Cs}_3\text{Cu}_2\text{I}_5$  and (b)  $\text{CsCu}_2\text{I}_3$  and (c)  $\text{Cs}_3\text{Cu}_2\text{I}_5@ \text{CsCu}_2\text{I}_3$  composites. Cu 2p region of the XPS spectra of (d)  $\text{Cs}_3\text{Cu}_2\text{I}_5$  and (e)  $\text{CsCu}_2\text{I}_3$  and (f)  $\text{Cs}_3\text{Cu}_2\text{I}_5@ \text{CsCu}_2\text{I}_3$  composites.

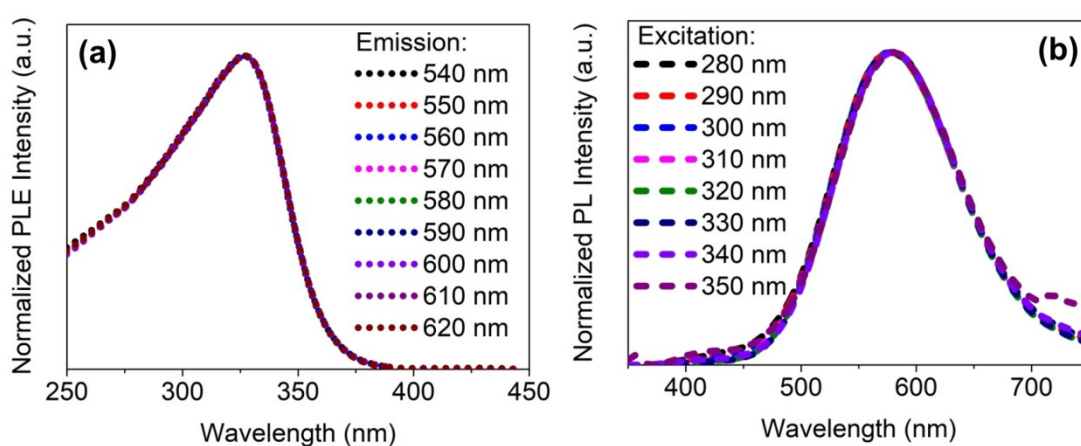

**Figure S2.** (a) PLE spectra of  $\text{CsCu}_2\text{I}_3$  measured at different emission wavelengths. (b) PL spectra of  $\text{CsCu}_2\text{I}_3$  measured at different excitation wavelengths.

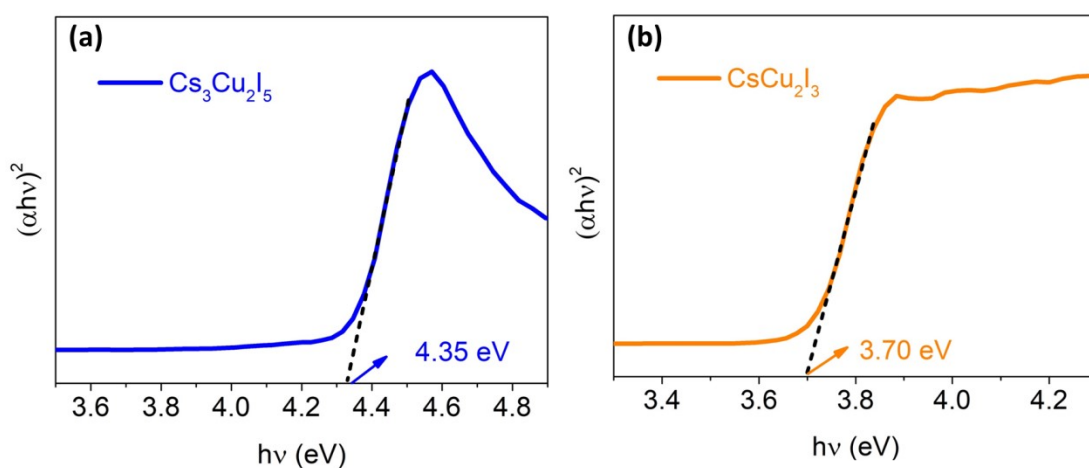

**Figure S3.** Band gaps of (a)  $\text{Cs}_3\text{Cu}_2\text{I}_5$  and (b)  $\text{CsCu}_2\text{I}_3$  evaluated from the absorption spectra in Figure 3a, using the equation of  $(\alpha hv)^2 = \alpha(hv - E_g)$ , where  $hv$  is the photon energy,  $\alpha$  is the absorption coefficient, and  $E_g$  is the band gap.

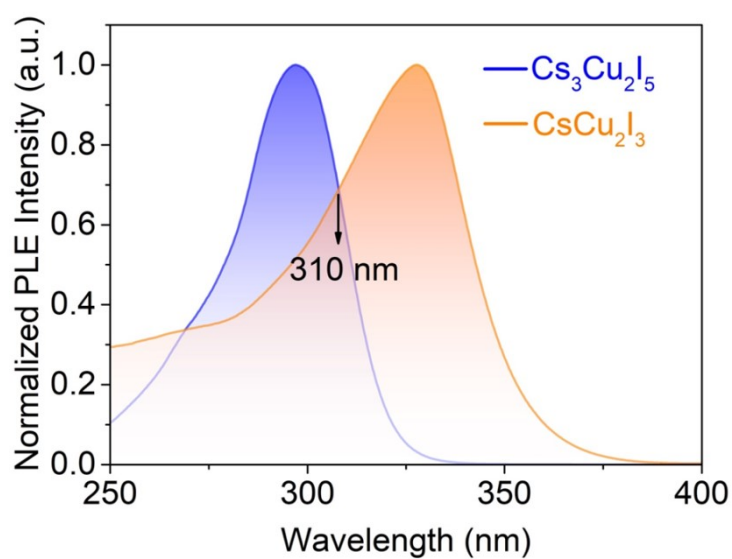

**Figure S4.** PLE spectra of  $\text{Cs}_3\text{Cu}_2\text{I}_5$  and  $\text{CsCu}_2\text{I}_3$ .

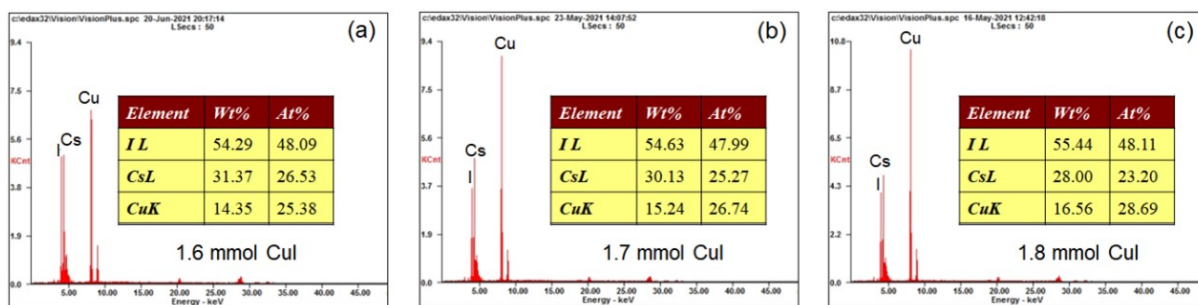

**Figure S5.** XRF spectra of  $\text{CsCu}_2\text{I}_3@ \text{Cs}_3\text{Cu}_2\text{I}_5$  composites synthesized with 1.6, 1.7 and 1.8 mmol of CuI, respectively.

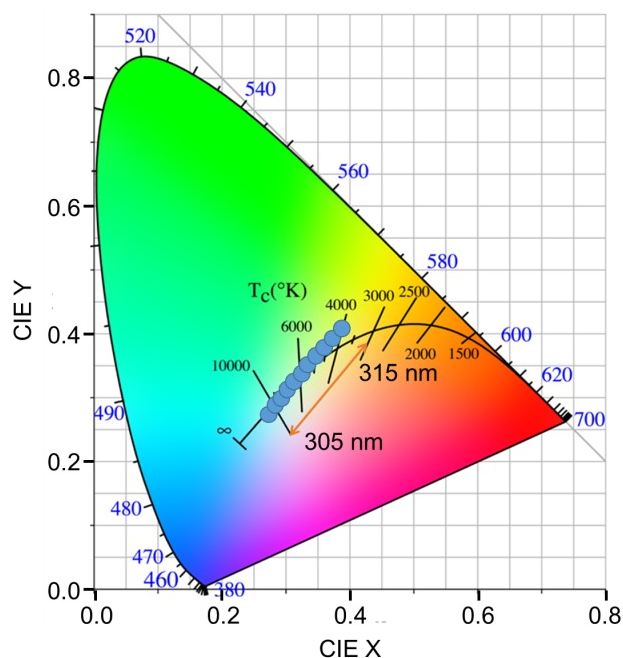

**Figure S6.** CIE color coordinates of the  $\text{Cs}_3\text{Cu}_2\text{I}_5@ \text{CsCu}_2\text{I}_3$  composite with 1.7 mmol of CuI, obtained using the excitation wavelengths ranging from 305 to 315 nm.

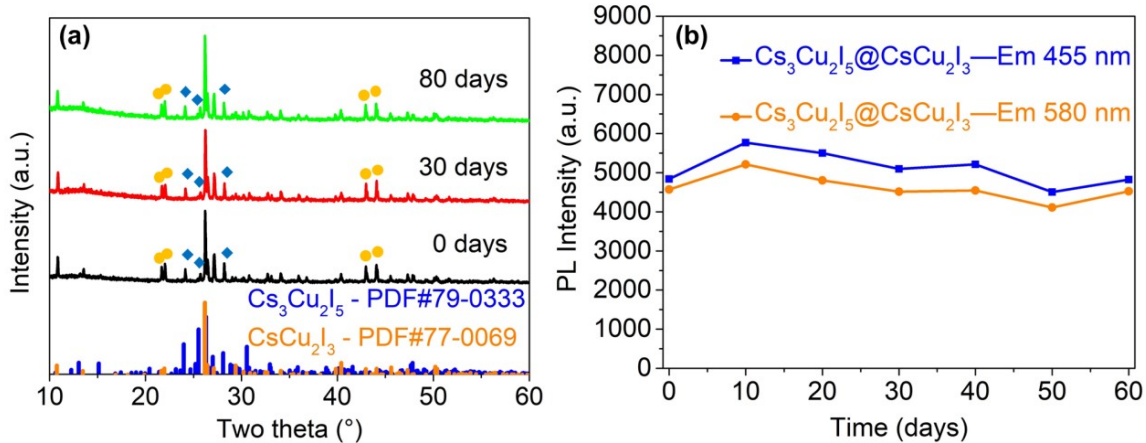

**Figure S7.** (a) Comparison of XRD patterns of the  $\text{CsCu}_2\text{I}_3@ \text{Cs}_3\text{Cu}_2\text{I}_5$  composite synthesized with 1.6 mmol of CuI, after storage for 0, 30 and 80 days in ambient air. (b) PL stability of the  $\text{CsCu}_2\text{I}_3@ \text{Cs}_3\text{Cu}_2\text{I}_5$  composite in ambient air.

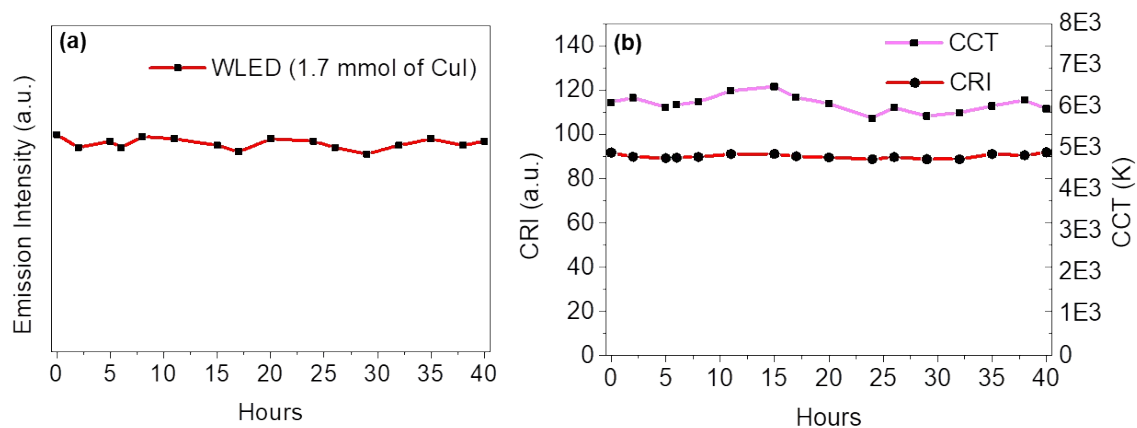

**Figure S8.** (a) the stability of WLED (1.7 mmol of CuI) under operated at voltage of 5 V. (b) CRI and CCT of the WLED as functions of running time in ambient air.

**Table S1.** The estimated molar contents of  $\text{Cs}_3\text{Cu}_2\text{I}_5$  and  $\text{CuCu}_2\text{I}_3$  in the composites according to XRF results.

| Samples  | $\text{Cs}_3\text{Cu}_2\text{I}_5$ | $\text{CsCu}_2\text{I}_3$ |
|----------|------------------------------------|---------------------------|
| 1.6 mmol | 54.5%                              | 45.5%                     |
| 1.7 mmol | 44.5%                              | 55.5%                     |
| 1.8 mmol | 37.9%                              | 62.1%                     |
